# Supplementary material for: A polymer/clay nanocomposite gel via chlorinated paraffin solvent initiated photopolymerization with electrorheological performance
Source: Royal Society of Chemistry journal article supplement (doi:10.1039/c4ra14275f), 2014-12-19
Supplement: c4ra14275f1.pdf [file c4ra14275f1.pdf]

Electronic Supplementary Information for

**Polymer/Clay Nanocomposite Gel via Chlorinated Paraffin  
Solvent Initiated Photopolymerization with  
Electrorheological Performance**

Yuemei Ye, and Qigang Wang\*

Department of Chemistry, and Advanced Research Institute, Tongji University, Shanghai 200092,  
P. R. China

**1. Materials and reagents**

Chlorinated paraffins52 (CP-52) was purchased from Shanghai Wenhua chemical paint Co., Ltd. Clay-NS (Laponite RD) was purchased from Rockwood Ltd.. N, N-dimethylacrylamide (DMAA) was purchased from Sinopharm Chemical Reagent Co., Ltd (Shanghai, China) in analytical grade. All materials and reagents were used with no further purification.

**2. Instruments and characterizations**

*2.1 Electron Paramagnetic Resonance (EPR) measurements:* The EPR results were obtained on an EPR Spectrometer (A300, Bruker) at 9.873 GHz. As for the Cl radical signals,  $\alpha$ -phenyl-tert-butyl-nitron (PBN) is a kind of catcher of chlorine radical for the EPR measurement, which was added to CP-52, then the mixture was put under UV irradiation (average 20.0 mw/cm<sup>2</sup> intensity at 365nm), and the spectrum was recorded after 20s. For the carbon radical, 80% CP-52 and 20% DMAA were mixed together, then the mixture was placed in the EPR Spectrometer and irradiated under in-situ UV light, the spectrum was recorded after 2 min.

*2.2 NMR measurement:* All the proton NMR spectra were obtained using a Bruker ARX-400 (400 MHz) spectrometer. Precursor solution contains CP-52 (780 mg), DMAA (200 mg) and Clay-NS (20mg), dioxane was added as internal standard. The mole concentration ratio of DMAA and dioxane was 32 to 1. The mixture was irradiated under UV lamp (fixed 22.4 mw cm<sup>-2</sup> intensity at 365 nm) to gelation for 0 min, 5 min, 10 min, 15 min, 30 min, 60 min, 120 min, 180 min and then fully dissolved in D<sub>2</sub>O and stand for more than 48h, then the suspension solutions were centrifuged and the supernatants were used for NMR measurements.

*2.3 Mechanical and morphological measurement:* The compressive measurement was finished on a FR-108B tensile-compressive tester which produced by Farui Co.. The thickness of the sample was 13mm and the diameter of the sample was 18mm. The measurements were operated at the cross-head speed of 1mm/min and compressed for 95%.

The rheological measurements were tested on a Haake Rheotest 6000 (Thermo Scientific, Karlsruhe, Germany) rheometer with a parallel plate geometry, all the gap size in parallel plate geometry used for electrorheological measurements were 0.4mm. The rheological measurements of gel under electrical field were measured with a special 35 inert rotor. The clay/chlorinated paraffin nanocomposite gel were tested at a strain of 0.1% and a frequency of 1 rad·s<sup>-1</sup>, and applied with 2kV/mm electrical field from 78s to 600s. The rheological measurements were all operated with a parallel plate geometry 0.4 mm gap. The recovery in response to applied shear forces was investigated by continuous step strain sweep test with alternate small oscillation force ( $\gamma = 1.35\%$ ) and large one ( $\gamma = 267\%$ ) expressed in terms (duration in parentheses): 1.35% (56 s) → 267% (56 s) → 1.35% (56 s) → 267% (56 s) → 1.35% (56 s) → 267% (56s) → 1.35% (56s) → 267% (56s).

*2.4 Scanning electron microscope (SEM) measurement:* Scanning electron microscope (SEM) images were obtained on Hitachi S-4800 with 1 kV accelerating voltages. The samples for analysis were cut into cubes of about 2×2×2 mm<sup>3</sup> from the inner parts of material. Then the samples were rapidly quenched into liquid nitrogen, and dried by critical point drying (Critical Point Dryer CPD, K850, Quorum), sputter-coated with a thin layer of gold (about 5 nm) before scanning.

### 3. Figures

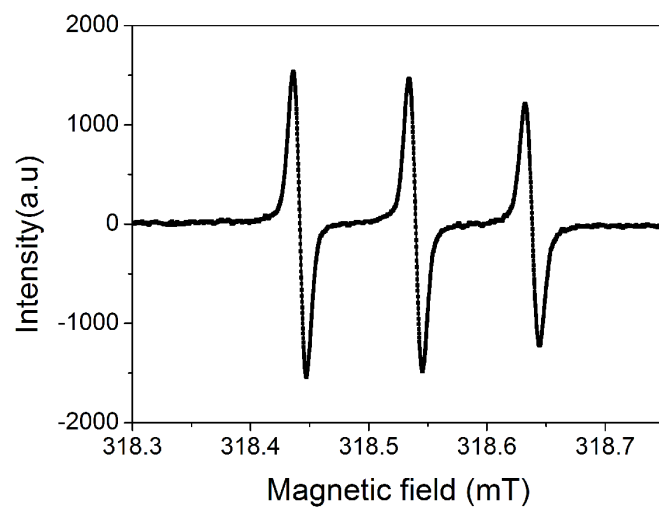

**Fig. S1** EPR spectra of DMAA with CP-52 under 2 min UV irradiation.

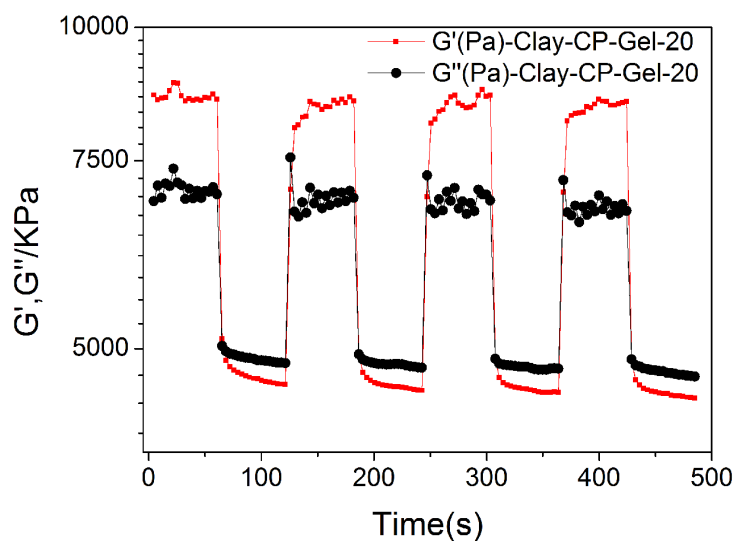

**Fig. S2** The self-recovering nature of Clay-CP-Gel-20 (the gel consists of 2% clay and 20% DMAA in CP-52) by continuous step strain sweep test with alternate small oscillation force ( $\gamma = 1.35\%$ ) and large one ( $\gamma = 267\%$ ).

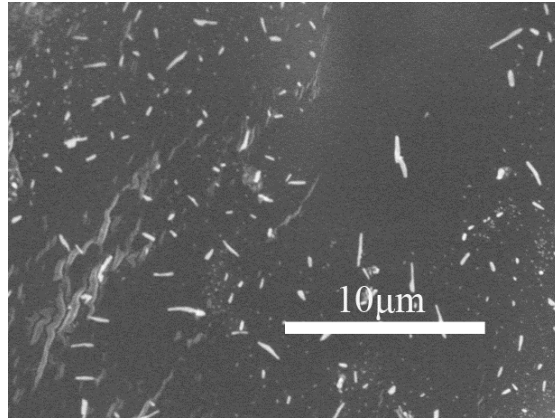

**Fig. S3** Scanning electron microscopy image of the aggregated clay in Clay-CP-Gel-11.

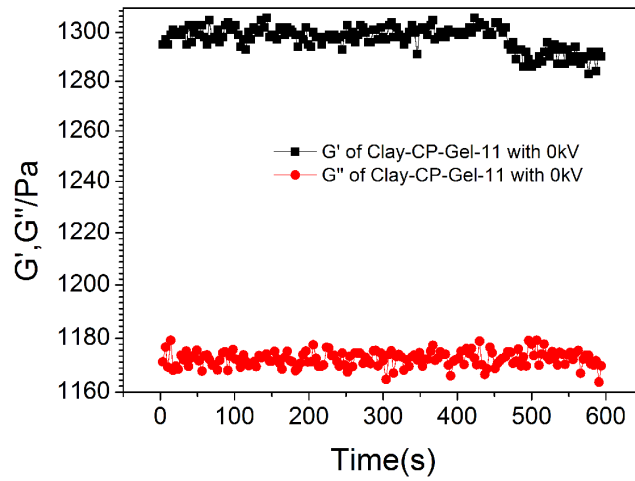

**Fig. S4** The process of Clay-CP-Gel-11's elastic modulus and storage modulus change at a strain of 0.1% and a frequency of 1 rad.s<sup>-1</sup> under 0kV/mm electrical field.
